# Supplementary material for: Variability in Ejection Fraction Measured By Echocardiography, Gated Single-Photon Emission Computed Tomography, and Cardiac Magnetic Resonance in Patients With Coronary Artery Disease and Left Ventricular Dysfunction
Source: PubMed Central journal article supplement (PMC6324278; doi:10.1001/jamanetworkopen.2018.1456), 2018-08-31
Supplement: jamanetwopen-1-e181456-s001.pdf [file jamanetwopen-1-e181456-s001.pdf]

## Supplementary Online Content

Pellikka PA, She L, Holly TA, et al. Variability in ejection fraction measured by echocardiography, gated single-photon emission computed tomography, and cardiac magnetic resonance in patients with coronary artery disease and left ventricular dysfunction. *JAMA Netw Open*. 2018;1(4):e181456.  
doi:10.1001/jamanetworkopen.2018.1456

**eFigure.** Bland-Altman Plots for LVEF After Exclusion of SPECT LVEF Data When Obtained After Stress

**eTable.** Prognostic Effect of LVEF Measures in Cox Regression Model

This supplementary material has been provided by the authors to give readers additional information about their work.

**eFigure.** Bland-Altman Plots for LVEF After Exclusion of SPECT LVEF Data When Obtained After Stress

**A.** Biplane Simpson's Method by Echocardiography and Gated SPECT

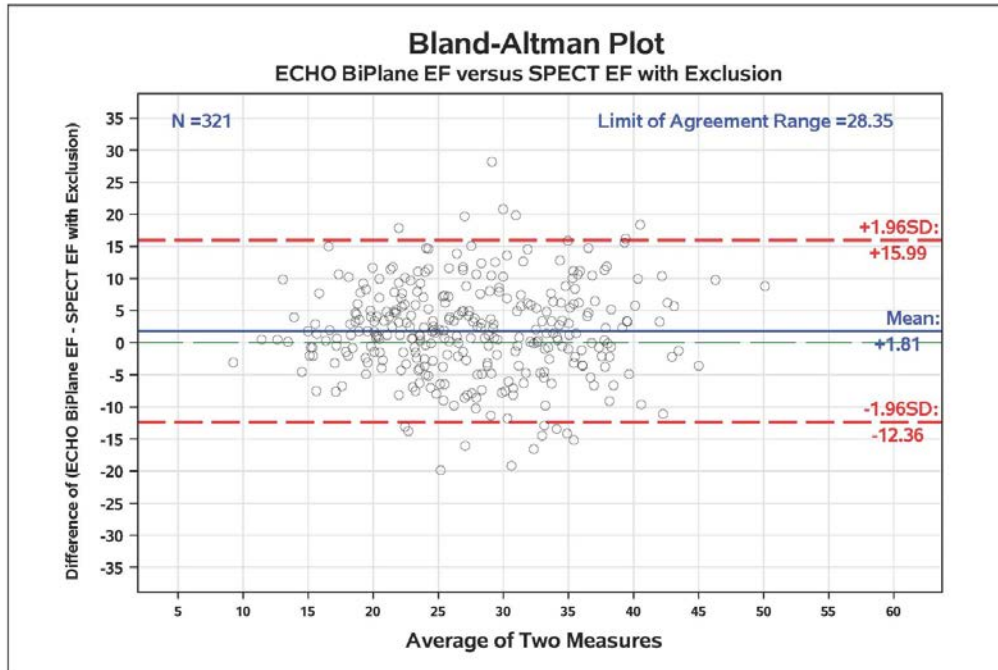

**B.** Gated SPECT and CMR

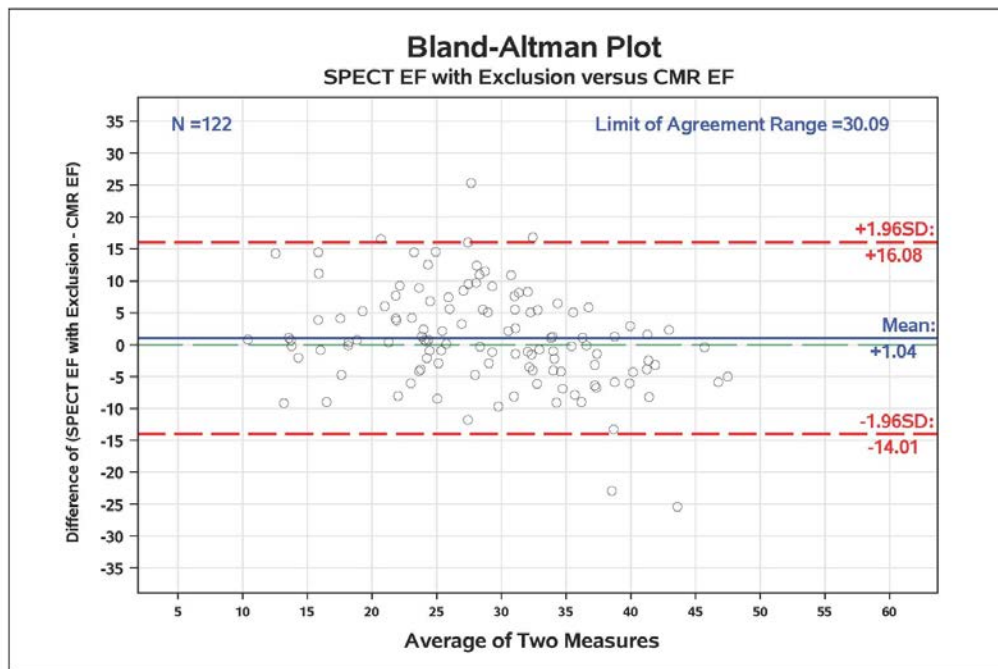

Plots are compared for A. Biplane Simpson's method by echocardiography and gated SPECT, B. Gated SPECT and CMR

**eTable.** Prognostic Effect of LVEF Measures in Cox Regression Model

| <b>Variables</b>                  | <b>Number of Patients with LVEF Data by Modality</b> | <b>Number of Deaths</b> | <b>Likelihood Ratio Chi-square</b> | <b>Hazard Ratio (95% CI)<sup>1</sup></b> | <b>P value</b> |
|-----------------------------------|------------------------------------------------------|-------------------------|------------------------------------|------------------------------------------|----------------|
| Echocardiographic EF              | 1948                                                 | 924                     | 59.42                              | 0.86 (0.83, 0.90)                        | <0.001         |
| Echocardiographic Biplane EF      | 897                                                  | 434                     | 44.32                              | 0.83 (0.78, 0.88)                        | <0.001         |
| Echocardiographic Single Plane EF | 725                                                  | 317                     | 21.78                              | 0.86 (0.81, 0.92)                        | <0.001         |
| Echocardiographic Visual EF       | 1941                                                 | 922                     | 54.63                              | 0.86 (0.82, 0.90)                        | <0.001         |
| SPECT EF                          | 774                                                  | 391                     | 37.04                              | 0.83 (0.78, 0.88)                        | <0.001         |
| CMR EF                            | 417                                                  | 159                     | 10.92                              | 0.89 (0.82, 0.96)                        | 0.012          |

Note: Hazard ratio and (95% CI) for every 5% increment of LVEF.
